# Supplementary material
Source: PubMed Central journal article supplement (PMC4383404)
Supplement: NIHMS631935-supplement-Supp_Tables.pdf [file NIHMS631935-supplement-Supp_Tables.pdf]

**Supplemental Table S1: Baseline Characteristics of Included vs. Excluded patients**

|                                        | <b>INCLUDED</b>    | <b>EXCLUDED</b>   | <b>P-Value</b>   |
|----------------------------------------|--------------------|-------------------|------------------|
|                                        | <b>N=2867</b>      | <b>N=1082</b>     |                  |
| <b>Clinical Trial</b>                  |                    |                   | <b>&lt;0.001</b> |
| <b>MADIT-I (%)</b>                     | <b>176 (6.1)</b>   | <b>20 (1.9)</b>   |                  |
| <b>MADIT-II (%)</b>                    | <b>1080 (37.7)</b> | <b>152 (14.1)</b> |                  |
| <b>SCD-HeFT (%)</b>                    | <b>1611 (56.2)</b> | <b>910 (84.1)</b> |                  |
| <b>Therapy assignment</b>              |                    |                   | <b>&lt;0.001</b> |
| <b>ICD (%)</b>                         | <b>1533 (53.5)</b> | <b>133 (12.3)</b> |                  |
| <b>Patient Demographics</b>            |                    |                   |                  |
| <b>Age (mean, yrs)</b>                 | <b>61.0</b>        | <b>60.6</b>       | <b>0.32</b>      |
| <b>Female Gender (%)</b>               | <b>544 (19.0)</b>  | <b>252 (23.3)</b> | <b>0.003</b>     |
| <b>Race</b>                            |                    |                   | <b>0.02</b>      |
| <b>White (%)</b>                       | <b>2336 (81.5)</b> | <b>849 (78.5)</b> |                  |
| <b>Black (%)</b>                       | <b>387 (13.5)</b>  | <b>154 (14.2)</b> |                  |
| <b>Other (%)</b>                       | <b>144 (5.0)</b>   | <b>79 (7.3)</b>   |                  |
| <b>Comorbidities</b>                   |                    |                   |                  |
| <b>History of CHF(%)</b>               | <b>1620 (56.5)</b> | <b>422 (39.0)</b> | <b>&lt;0.001</b> |
| <b>Hypertension (%)</b>                | <b>1527 (53.3)</b> | <b>609 (56.3)</b> | <b>0.09</b>      |
| <b>Diabetes (%)</b>                    | <b>877 (30.6)</b>  | <b>335 (31.0)</b> | <b>0.85</b>      |
| <b>Cardiac Disease characteristics</b> |                    |                   |                  |
| <b>LVEF % (mean)</b>                   | <b>23.7</b>        | <b>23.7</b>       | <b>0.75</b>      |
| <b>Prior CABG (%)</b>                  | <b>1148 (40.0)</b> | <b>319 (29.5)</b> | <b>&lt;0.001</b> |
| <b>Left BBB (%)</b>                    | <b>557 (20.0)</b>  | <b>227 (21.3)</b> | <b>0.35</b>      |
| <b>NYHA class</b>                      |                    |                   | <b>&lt;0.001</b> |

|                                     |                    |                    |                  |
|-------------------------------------|--------------------|--------------------|------------------|
| <b>Class 1(%)</b>                   | <b>481 (16.8)</b>  | <b>30 (2.8)</b>    |                  |
| <b>Class 2(%)</b>                   | <b>1592 (55.5)</b> | <b>688 (64.5)</b>  |                  |
| <b>Class 3(%)</b>                   | <b>794 (27.7)</b>  | <b>296 (27.7)</b>  |                  |
| <b>Medication use at enrollment</b> |                    |                    |                  |
| <b>Antiarrhythmic (%)</b>           | <b>82 (2.9)</b>    | <b>853 (78.8)</b>  | <b>&lt;0.001</b> |
| <b>Beta-blockers (%)</b>            | <b>1823 (63.6)</b> | <b>705 (65.2)</b>  | <b>0.37</b>      |
| <b>ACE inhibitor (%)</b>            | <b>2482 (86.6)</b> | <b>1018 (94.1)</b> | <b>&lt;0.001</b> |
| <b>Estimated GFR</b>                |                    |                    |                  |
| <b>Mean (ml/min)</b>                | <b>68.7</b>        | <b>68.1</b>        | <b>0.48</b>      |
| <b>GFR&lt;30 ml/min (%)</b>         | <b>107 (3.7)</b>   | <b>28 (2.7)</b>    | <b>0.11</b>      |

**Abbreviations: LVEF, left ventricular ejection fraction; ICD, implantable cardioverter defibrillator; CHF, congestive heart failure; CABG, coronary artery bypass grafting; BBB, bundle branch block; NYHA, New York Heart Association; ACE, angiotension converting enzyme.**

**Supplemental Table S2: Baseline Characteristics of Patients Assigned to ICD vs. No ICD, eGFR>=60.**

|                                        | Assigned to ICD<br>therapy<br>N=992 | Assigned to Control<br>N=835 | P-Value          |
|----------------------------------------|-------------------------------------|------------------------------|------------------|
| <b>Clinical Trial</b>                  |                                     |                              | <b>&lt;0.001</b> |
| MADIT-I (%)                            | 50 (5.0)                            | 47 (5.6)                     |                  |
| MADIT-II (%)                           | 412 (41.5)                          | 245 (29.3)                   |                  |
| SCD-HeFT (%)                           | 530 (53.4)                          | 543 (65.0)                   |                  |
| <b>Therapy assignment</b>              |                                     |                              | <b>&lt;0.001</b> |
| ICD (%)                                | 992 (100.0)                         | 0 (0)                        |                  |
| <b>Patient Demographics</b>            |                                     |                              |                  |
| Age (mean, yrs)                        | 58.5                                | 57.2                         | 0.01             |
| Female Gender (%)                      | 175 (17.6)                          | 156 (18.7)                   | 0.58             |
| Race                                   |                                     |                              | 0.03             |
| White (%)                              | 806 (81.3)                          | 654 (78.3)                   |                  |
| Black (%)                              | 146 (14.7)                          | 124 (14.9)                   |                  |
| Other (%)                              | 40 (4.0)                            | 57 (6.8)                     |                  |
| <b>Comorbidities</b>                   |                                     |                              |                  |
| History of CHF(%)                      | 591 (59.6)                          | 405 (48.5)                   | <0.001           |
| Hypertension (%)                       | 491 (49.6)                          | 415 (49.7)                   | 1                |
| Diabetes (%)                           | 271 (27.3)                          | 237 (28.4)                   | 0.64             |
| <b>Cardiac Disease characteristics</b> |                                     |                              |                  |
| LVEF % (mean)                          | 23.65                               | 23.9                         | 0.35             |
| Prior CABG (%)                         | 375 (37.8)                          | 283 (33.9)                   | 0.09             |
| Left BBB (%)                           | 186 (19.1)                          | 155 (18.8)                   | 0.90             |

|                                     |            |            |             |
|-------------------------------------|------------|------------|-------------|
| <b>NYHA class</b>                   |            |            | <b>0.02</b> |
| Class 1(%)                          | 193 (19.5) | 125 (15.0) |             |
| Class 2(%)                          | 562 (56.7) | 521 (62.4) |             |
| Class 3(%)                          | 237 (23.9) | 189 (22.6) |             |
| <b>Medication use at enrollment</b> |            |            |             |
| Antiarrhythmic (%)                  | 17 (1.7)   | 27 (3.2)   | 0.05        |
| Beta-blockers (%)                   | 661 (66.6) | 548 (65.6) | 0.66        |
| ACE inhibitor (%)                   | 853 (86.0) | 767 (91.9) | <0.001      |
| <b>Estimated GFR</b>                |            |            |             |
| Mean (ml/min)                       | 82.4       | 81.4       | 0.18        |
| GFR<30 ml/min (%)                   | 0 (0)      | 0 (0)      |             |

**Abbreviations: LVEF, left ventricular ejection fraction; ICD, implantable cardioverter defibrillator; CHF, congestive heart failure; CABG, coronary artery bypass grafting; BBB, bundle branch block; NYHA, New York Heart Association; ACE, angiotension converting enzyme.**

**Supplemental Table S3: Baseline Characteristics of Patients Assigned to ICD vs. No ICD, eGFR<60.**

|                                        | Assigned to ICD<br>therapy<br><br>N=541 | Assigned to Control<br><br>N=499 | P-Value     |
|----------------------------------------|-----------------------------------------|----------------------------------|-------------|
| <b>Clinical Trial</b>                  |                                         |                                  | <b>0.01</b> |
| MADIT-I (%)                            | 35 (6.5)                                | 44 (8.8)                         |             |
| MADIT-II (%)                           | 243 (44.9)                              | 180 (36.1)                       |             |
| SCD-HeFT (%)                           | 263 (48.6)                              | 275 (55.1)                       |             |
| <b>Therapy assignment</b>              |                                         |                                  |             |
| ICD (%)                                | 541 (100.0)                             | 0 (0)                            | <0.001      |
| <b>Patient Demographics</b>            |                                         |                                  |             |
| Age (mean, yrs)                        | 67.1                                    | 66.2                             | 0.13        |
| Female Gender (%)                      | 117 (21.6)                              | 96 (19.2)                        | 0.36        |
| Race                                   |                                         |                                  | 0.75        |
| White (%)                              | 459 (84.8)                              | 417 (83.6)                       |             |
| Black (%)                              | 60 (11.1)                               | 57 (11.4)                        |             |
| Other (%)                              | 22 (4.1)                                | 25 (5.0)                         |             |
| <b>Comorbidities</b>                   |                                         |                                  |             |
| History of CHF(%)                      | 346 (64.0)                              | 278 (55.7)                       | 0.01        |
| Hypertension (%)                       | 327 (66.2)                              | 294 (59.0)                       | 0.66        |
| Diabetes (%)                           | 183 (33.8)                              | 186 (37.4)                       | 0.24        |
| <b>Cardiac Disease characteristics</b> |                                         |                                  |             |
| LVEF % (mean)                          | 23.5                                    | 23.5                             | 0.89        |
| Prior CABG (%)                         | 266 (49.2)                              | 224 (44.9)                       | 0.17        |
| Left BBB (%)                           | 115 (22.4)                              | 101 (21.0)                       | 0.59        |

|                                     |            |            |             |
|-------------------------------------|------------|------------|-------------|
| <b>NYHA class</b>                   |            |            | <b>0.68</b> |
| Class 1(%)                          | 82 (15.2)  | 81 (16.2)  |             |
| Class 2(%)                          | 261 (48.2) | 248 (49.7) |             |
| Class 3(%)                          | 198 (36.6) | 170 (34.1) |             |
| <b>Medication use at enrollment</b> |            |            |             |
| Antiarrhythmic (%)                  | 12 (2.2)   | 26 (5.2)   | 0.01        |
| Beta-blockers (%)                   | 330 (61.0) | 284 (56.9) | 0.19        |
| ACE inhibitor (%)                   | 452 (83.6) | 410 (82.2) | 0.57        |
| <b>Estimated GFR</b>                |            |            |             |
| Mean (ml/min)                       | 45.3       | 45.5       | 0.70        |
| GFR<30 ml/min (%)                   | 53 (9.8)   | 54 (10.8)  | 0.79        |

**Abbreviations:** LVEF, left ventricular ejection fraction; ICD, implantable cardioverter defibrillator; CHF, congestive heart failure; CABG, coronary artery bypass grafting; BBB, bundle branch block; NYHA, New York Heart Association; ACE, angiotension converting enzyme.
